# Supplementary material for: Multihalogenated Zn phthalocyanine as a precursor for porous Zn–N4–C carbons toward electrocatalytic oxygen reduction
Source: Royal Society of Chemistry journal article supplement (doi:10.1039/d4cc05813e), 2024-12-05
Supplement: d4cc05813e1.pdf [file d4cc05813e1.pdf]

Electronic Supplementary Information (ESI†)

**Multihalogenated Zn phthalocyanine as a precursor for porous Zn–N<sub>4</sub>–C carbons  
toward electrocatalytic oxygen reduction**

Keisuke Sakamoto, Yasuhiro Shiraishi,\* Keisuke Kinoshita, Koki Yoshida,  
Wataru Hiramatsu, and Takayuki Hirai

shiraishi.yasuhiro.es@osaka-u.ac.jp

**CONTENTS**

|                                                                                | Page |
|--------------------------------------------------------------------------------|------|
| <b>Methods</b> .....                                                           | 2    |
| <b>Table S1</b> Elemental compositions.....                                    | 4    |
| <b>Table S2</b> The performance and procedures of the reported catalysts ..... | 5    |
| <b>Fig. S1</b> SEM images of ZnPc samples .....                                | 6    |
| <b>Fig. S2</b> SEM images of G58 samples .....                                 | 7    |
| <b>Fig. S3</b> Powder XRD patterns.....                                        | 8    |
| <b>Fig. S4</b> Survey XPS results .....                                        | 9    |
| <b>Fig. S5</b> XPS (Br 3d) results.....                                        | 10   |
| <b>Fig. S6</b> XPS (Cl 2p) results.....                                        | 10   |
| <b>Fig. S7</b> XPS (C 1s) results .....                                        | 11   |
| <b>Fig. S8</b> TG-DTA data .....                                               | 12   |
| <b>Fig. S9</b> TG-DTA/EI-MS data.....                                          | 12   |
| <b>Fig. S10</b> XPS (Zn 2p <sub>3/2</sub> ) results.....                       | 13   |
| <b>Fig. S11</b> XPS (O 1s) results .....                                       | 14   |
| <b>Fig. S12</b> XPS (N 1s) results .....                                       | 15   |
| <b>Fig. S13</b> STEM-EDS results of ZnPc_NH <sub>3</sub> .....                 | 16   |
| <b>Fig. S14</b> STEM-EDS results of G58_NH <sub>3</sub> .....                  | 17   |
| <b>Fig. S15</b> Raman spectra .....                                            | 18   |
| <b>References</b> .....                                                        | 19   |

## Methods

### General

Water was purified by the Milli-Q system. ZnPc and G58 were supplied from DIC Corp. A 5 wt% Nafion dispersion (DE521CS) and other chemicals were purchased from Wako. The Pt/C catalyst (Pt 10 wt%, TEC10E10E) was purchased from Tanaka Precious Metals. All reagents were used without further purification.

### Synthesis of catalysts

The catalysts were prepared by pyrolysis of ZnPc or G58 under N<sub>2</sub> gas flow (50 mL min<sup>-1</sup>) or 10% NH<sub>3</sub>/He mixed gas flow (50 mL min<sup>-1</sup>) in a tubular furnace at 1173 K, with a heating rate of 10 K min<sup>-1</sup> and a holding time of 2 h, respectively.

### LSV measurements

The LSV measurements were performed at room temperature in a RRDE system (RRDE-3A, BAS) using 0.1 M KOH (pH 13.0, 65 mL) as an electrolyte. The Pt coil and Ag/AgCl electrodes were used as the counter and reference electrodes, respectively. The working RRDE electrode was prepared as follows: the catalyst ink was made by ultrasonication of a mixture of pure water (1680 μL), catalyst (12.3 mg), 5 wt% Nafion dispersion (30 μL), and 2-propanol (420 μL). The ink (10 μL) was put onto a surface-polished glassy carbon electrode (4 mm diameter, 0.1257 cm<sup>2</sup>) and dried at room temperature, where the mass density of the catalyst was 0.46 mg cm<sup>-2</sup>. All potential values were referred to the reversible hydrogen electrode (RHE) using the following equation.<sup>[1]</sup>

$$E(\text{vs RHE}) = E(\text{vs Ag/AgCl}) + 0.197 + 0.059 \times \text{pH}$$

Prior to measurements, N<sub>2</sub> gas was bubbled through the electrolyte for 30 min, and cyclic voltammetry (CV) cycles (0.3–1.0 V (vs RHE)) were performed for 200 cycles for cleaning and activation of the catalyst. Then, O<sub>2</sub> was bubbled through the electrolyte for 30 min, and LSV measurements were performed at between 1.0 V to 0.3 V (vs RHE) with a scan rate of 2 mV s<sup>-1</sup> and a rotation speed of 1600 rpm. To exclude the capacitive effects, the obtained LSV curves were normalized by subtracting the data obtained in N<sub>2</sub>-saturated electrolyte.<sup>[2]</sup> During the measurements, the ring electrode potential was maintained at 1.1 V (vs RHE). The electron transfer number (*n*) per O<sub>2</sub> during ORR on the electrode was determined using the following equation:

$$n = \frac{4 \times I_D}{I_D + I_R/N}$$

*I<sub>D</sub>* is the disk current, *I<sub>R</sub>* is the ring current, and *N* is the collection efficiency of the ring (*N* = 0.424),<sup>[3]</sup> respectively.

### Analysis

SEM observations were performed using a JSM-7800F microscope (JEOL). XPS spectra were obtained on a PHI GENESIS spectrometer (ULVAC-PHI) with a monochromatic Al K $\alpha$  radiation

(1486.6 eV), where the obtained spectra were calibrated with respect to the sp<sup>2</sup> carbon peak (284.6 eV). The MultiPak software (ULVAC-PHI) was used for the deconvolution of the spectra using Gauss-Lorentz equations with a Shirley-type background, where the 70 % Gaussian/30 % Lorentzian line shape was used to evaluate the peak positions and areas.<sup>[4]</sup> The N<sub>2</sub> adsorption/desorption measurements were performed at 77 K using a BELSORP MAX X (Microtrac BEL). The specific surface areas were determined on the basis of the Brunauer–Emmett–Teller (BET) method, and the pore size distributions were determined based on the Barrett–Joyner–Halenda (BJH)<sup>[5]</sup> and micropore (MP) methods,<sup>[6]</sup> respectively. The TG-DTA/EI-MS analysis was performed on a Thermo Mass Photo system (Rigaku) using He as a carrier gas. The powder XRD patterns were recorded on the SmartLab (Rigaku) X-ray diffractometer with a Cu-K $\alpha$  radiation. The STEM images were acquired using a JEM-ARM300F (JEOL) microscope at an accelerating voltage of 80 kV, and STEM-EDS observations were conducted on a JEM-ARM300F (JEOL) microscope at 80 kV. The Zn contents of the samples were determined by using an inductively coupled plasma-optical emission spectrometry (ICP-OES, Agilent 5800), after dissolving the samples in nitric acid under microwave irradiation. Raman spectra were recorded on an NRS-5500 instrument (JASCO) with a 532 nm excitation laser.

**Table S1** Elemental compositions (wt%) of the respective samples.

|                      | C <sup>[a]</sup> | N <sup>[a]</sup> | H <sup>[a]</sup>    | Br <sup>[a]</sup> | Cl <sup>[a]</sup> | Zn <sup>[b]</sup> |
|----------------------|------------------|------------------|---------------------|-------------------|-------------------|-------------------|
| ZnPc <sup>[c]</sup>  | 66.5             | 19.4             | 2.8                 |                   |                   | 11.3              |
| G58 <sup>[d]</sup>   | 20.9–66.5        | 6.1–19.4         | <2.8                | <69.5             | <50.2             | 3.6–11.3          |
| ZnPc_N <sub>2</sub>  | 76.4             | 11.6             | <0.1 <sup>[e]</sup> |                   |                   | 11.0              |
| ZnPc_NH <sub>3</sub> | 73.2             | 13.0             | 0.1 <sup>[e]</sup>  |                   |                   | 11.0              |
| G58_N <sub>2</sub>   | 73.7             | 9.6              | 1.0 <sup>[e]</sup>  | 0.2               | <0.1              | 1.7               |
| G58_NH <sub>3</sub>  | 68.5             | 11.6             | 1.2 <sup>[e]</sup>  | 0.4               | <0.1              | 5.2               |

[a] Determined by the combustion method.

[b] Determined by the ICP–OES analysis.

[c] The theoretical values determined from the ZnPc structure.

[d] The theoretical values calculated from ZnPc, ZnPc-Cl<sub>16</sub>, and ZnPc-Br<sub>16</sub> structures.

[e] The H component may be attributable to the adsorbed water.

**Table S2** The ORR performance and preparation procedures of the reported Zn–N<sub>4</sub>–C catalysts.<sup>[a]</sup>

| Sample name             | Reagents used for catalyst preparation                                                 | Procedure                                                                | Onset potential / V vs RHE <sup>[b]</sup> | Half-wave potential / V vs RHE <sup>[c]</sup> | Current density @0.4 V, @1600 rpm / mA cm <sup>-2</sup> | Ref       |
|-------------------------|----------------------------------------------------------------------------------------|--------------------------------------------------------------------------|-------------------------------------------|-----------------------------------------------|---------------------------------------------------------|-----------|
| Zn-N-C                  | ZnPc, mesoporous silica (SBA-15)                                                       | pyrolysis (10 K min <sup>-1</sup> ), acid washing (5 wt% HF)             | 0.85                                      | 0.75                                          | 2.8 <sup>[d]</sup>                                      | [7]       |
| NC-0.5-S                | ZnCl <sub>2</sub> , 4,4'-bipyridine, SBA-15                                            | pyrolysis (2 K min <sup>-1</sup> ), acid washing (40 wt% HF)             | 0.97                                      | 0.89                                          | 5.3                                                     | [8]       |
| NDCF(Zn)-H2             | ZnPc, NaCl                                                                             | multiple pyrolysis, acid washing (0.5 M H <sub>2</sub> SO <sub>4</sub> ) | 1.01                                      | 0.88                                          | 5.9                                                     | [9]       |
| Zn-N-C-1                | ZnCl <sub>2</sub> , NH <sub>4</sub> S <sub>2</sub> O <sub>8</sub> , o-phenylenediamine | multiple pyrolysis (1 K min <sup>-1</sup> ), acid washing (1 M HCl)      | 0.96                                      | 0.87                                          | 5.0                                                     | [10]      |
| Zn <sub>1</sub> -2D-NOC | ZnPc, urea, dicyandiamide                                                              | pyrolysis (10 K min <sup>-1</sup> ), acid washing (37% HCl)              | 0.81                                      | 0.69                                          | 1.0                                                     | [11]      |
| ZnN <sub>x</sub> /BP    | Zn(OAC) <sub>2</sub> ·2H <sub>2</sub> O, urea carbon black (BP2000)                    | pyrolysis, acid washing (6 M HNO <sub>3</sub> )                          | 1.06                                      | 0.85                                          | 6.0                                                     | [12]      |
| G58_NH <sub>3</sub>     | G58 green pigment                                                                      | pyrolysis (10 K min <sup>-1</sup> ) under 10% NH <sub>3</sub> /He flow   | 0.91                                      | 0.78                                          | 5.4                                                     | This work |

[a] The ORR performance in all systems was monitored in 0.1 M KOH.

[b] The potential that generates a current density of < -0.1 mA cm<sup>-2</sup>.

[c] The potential that generates half the maximum current density.

[d] The data obtained at 900 rpm.

## ZnPc

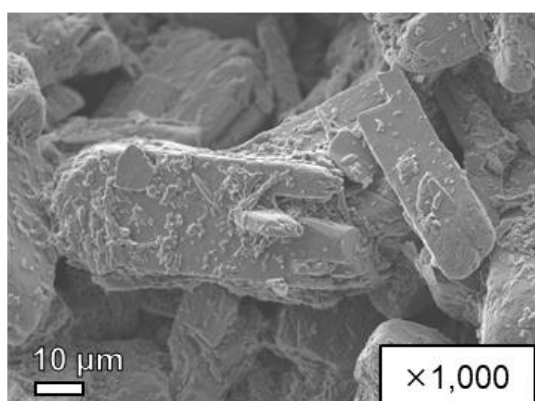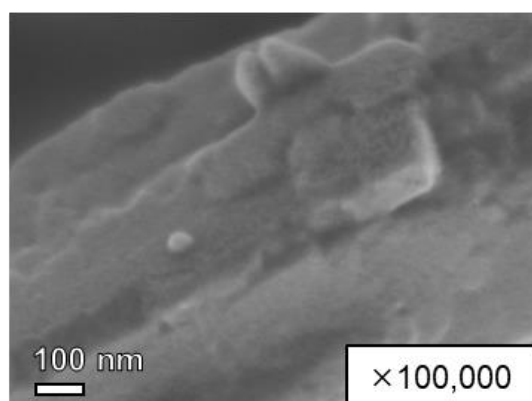

## ZnPc\_N<sub>2</sub>

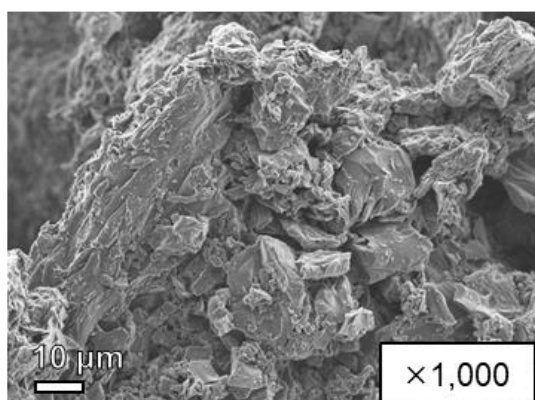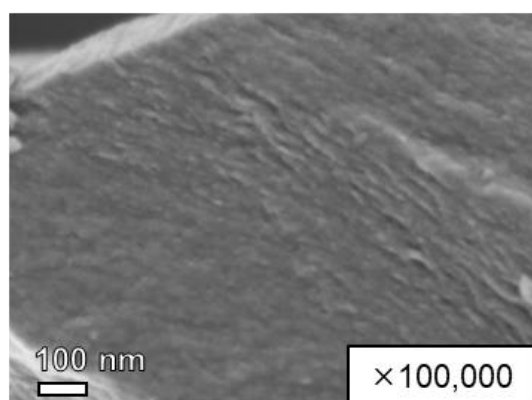

## ZnPc\_NH<sub>3</sub>

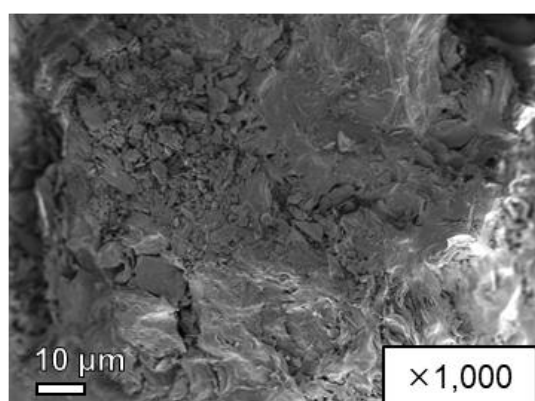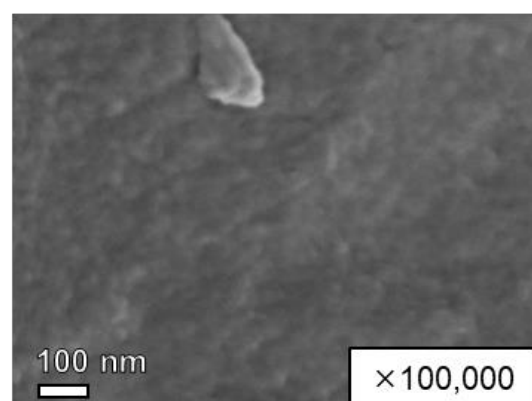

**Fig. S1** SEM images of ZnPc, ZnPc\_N<sub>2</sub>, and ZnPc\_NH<sub>3</sub>.

## G58

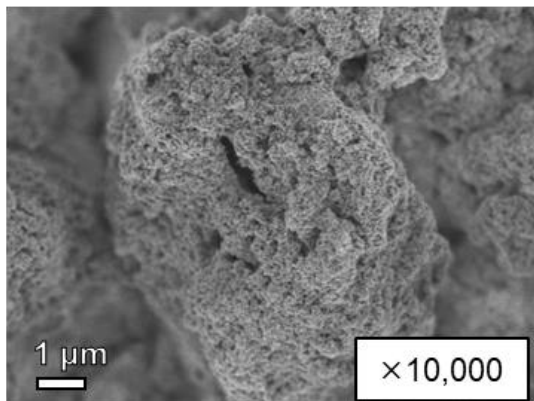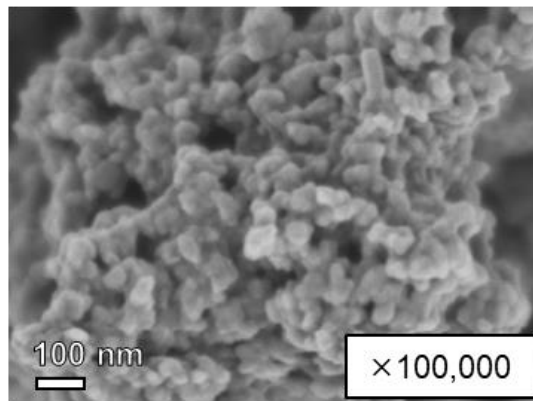

## G58\_N<sub>2</sub>

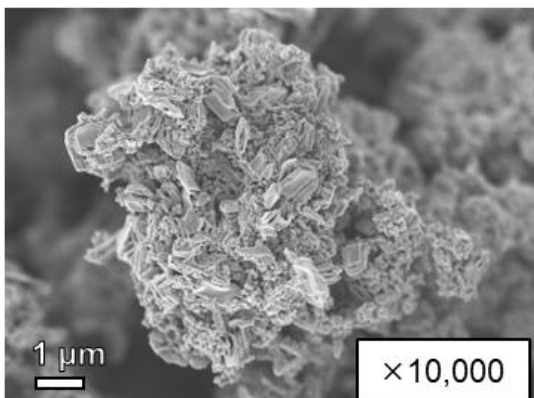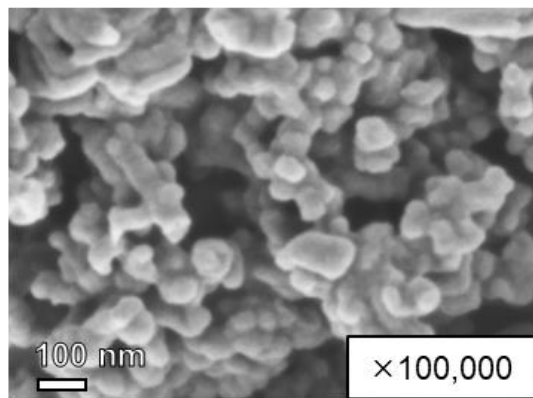

## G58\_NH<sub>3</sub>

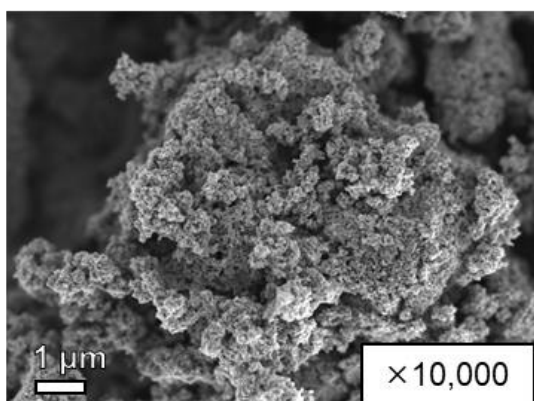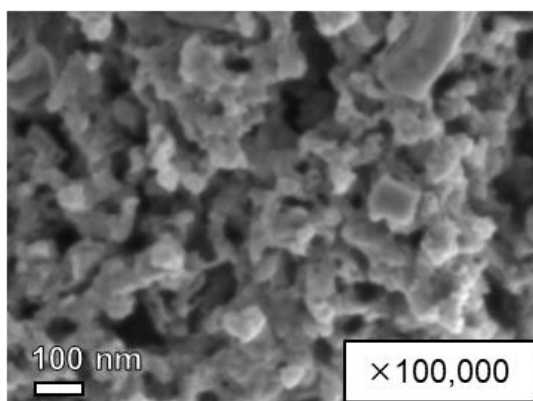

Fig. S2 SEM images of G58, G58\_N<sub>2</sub>, and G58\_NH<sub>3</sub>.

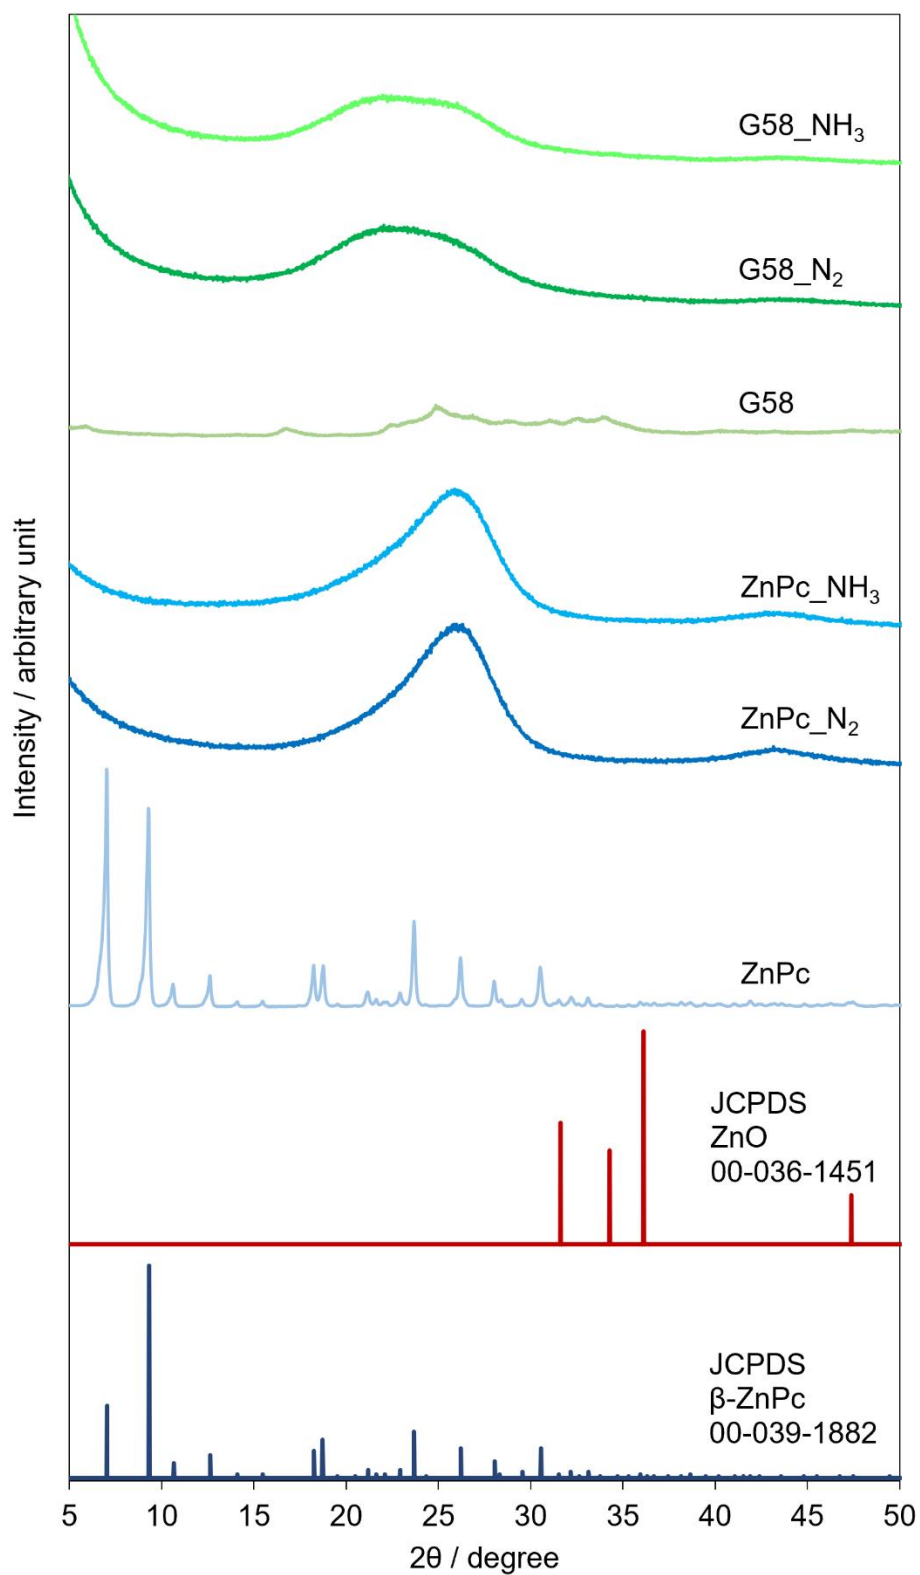

**Fig. S3** Powder XRD patterns of ZnPc and G58 and their corresponding carbons.



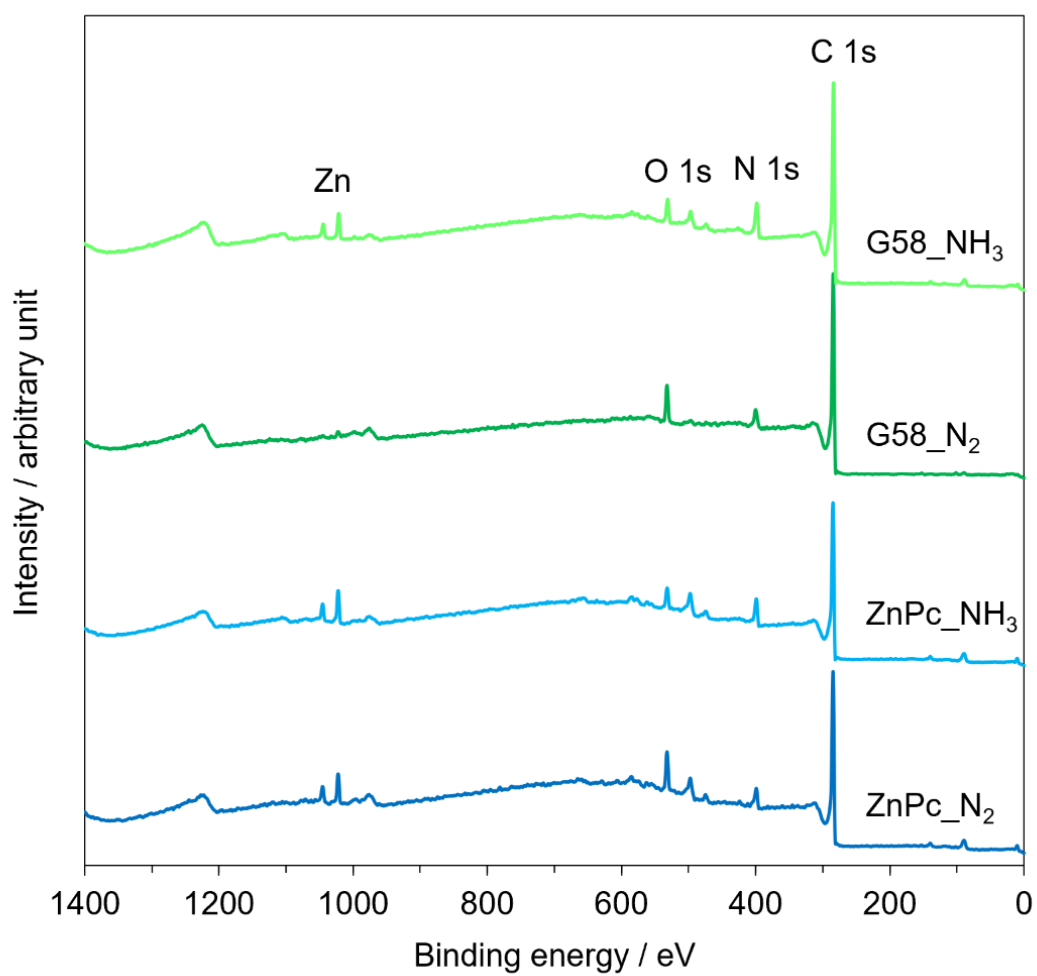

**Fig. S4** The XPS survey spectra of the carbons.

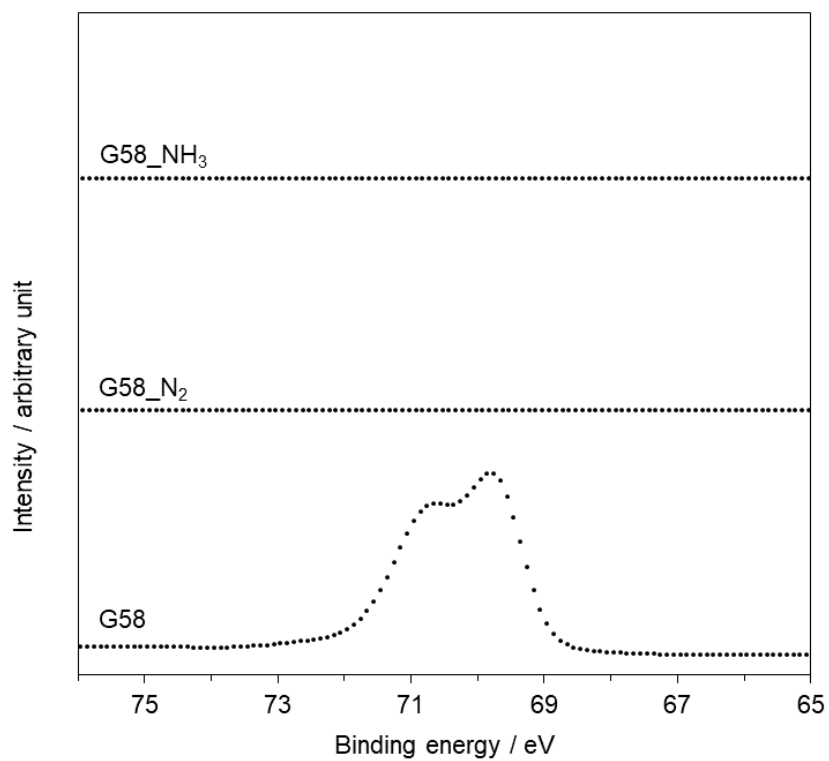

**Fig. S5** The Br 3d XPS spectra of G58 and its corresponding carbons.

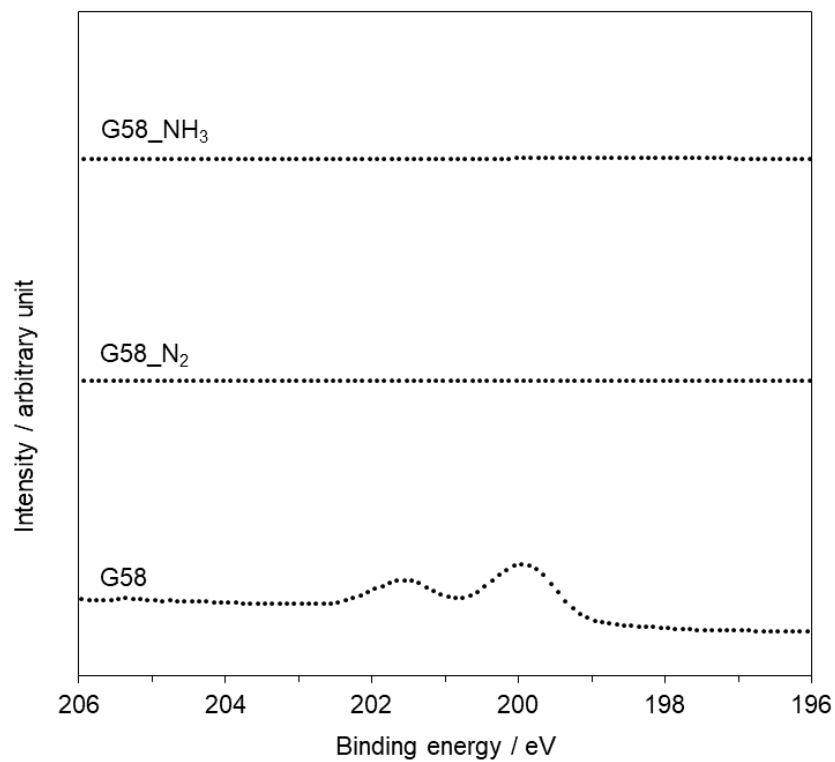

**Fig. S6** The Cl 2p XPS spectra of G58 and its corresponding carbons.

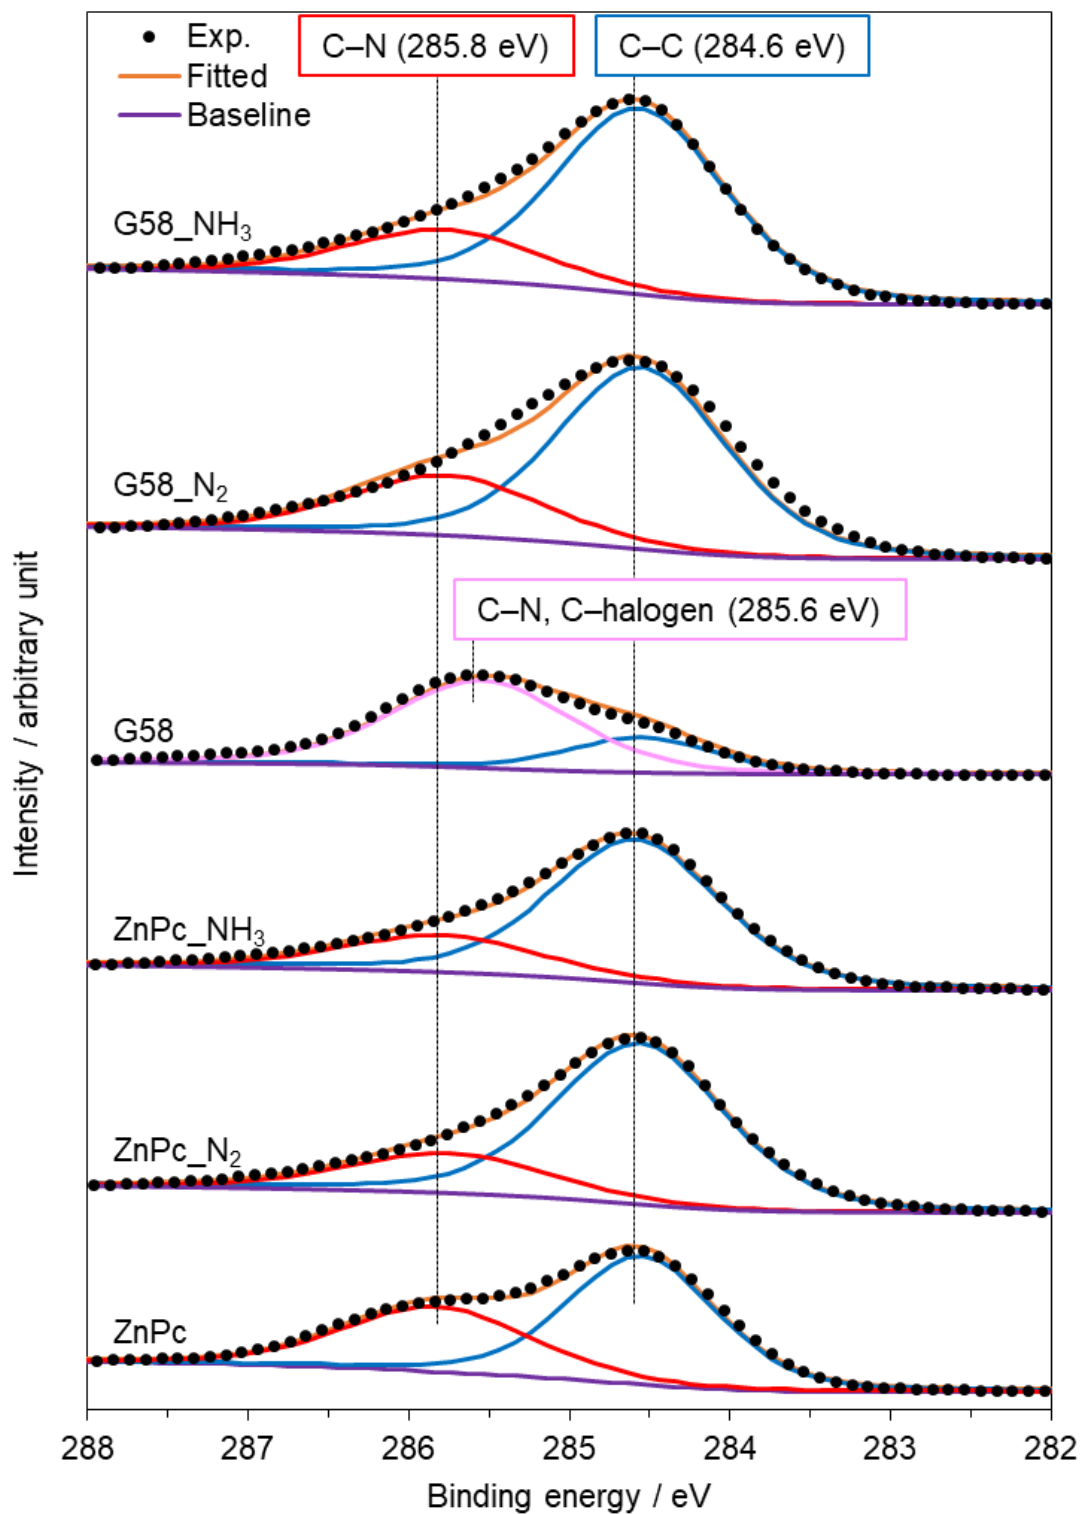

**Fig. S7** The C 1s XPS spectra of ZnPc and G58 and their corresponding carbons.

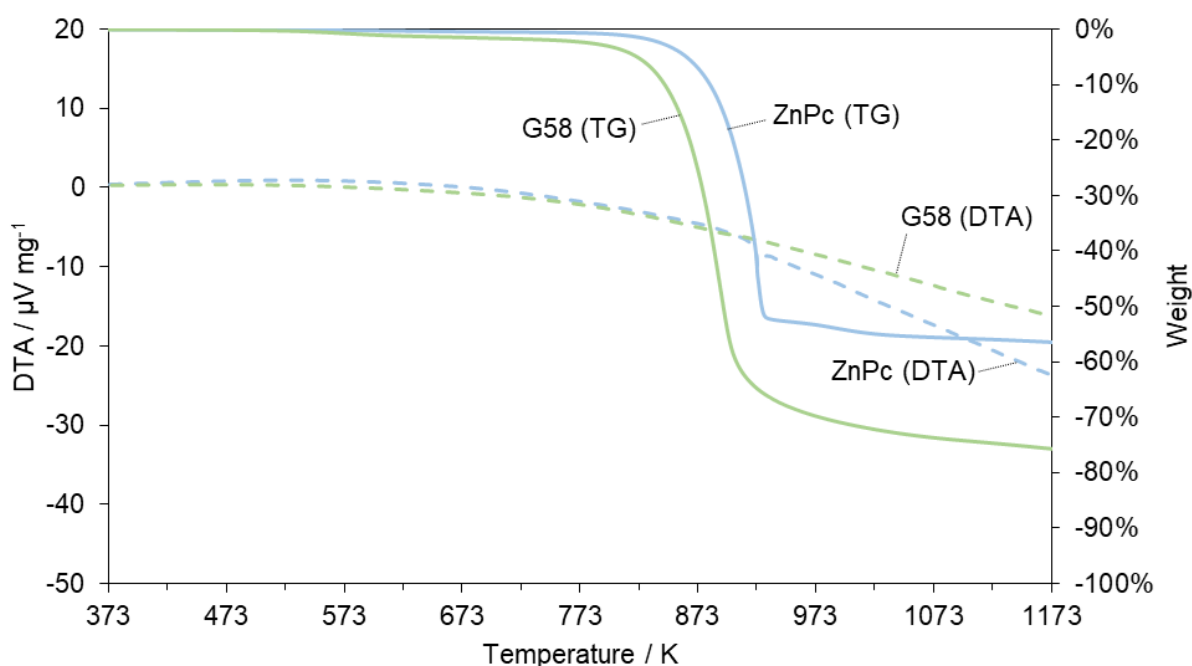

**Fig. S8** TG-DTA data of ZnPc and G58 monitored under  $\text{N}_2$  flow (heating rate:  $10 \text{ K min}^{-1}$ ).

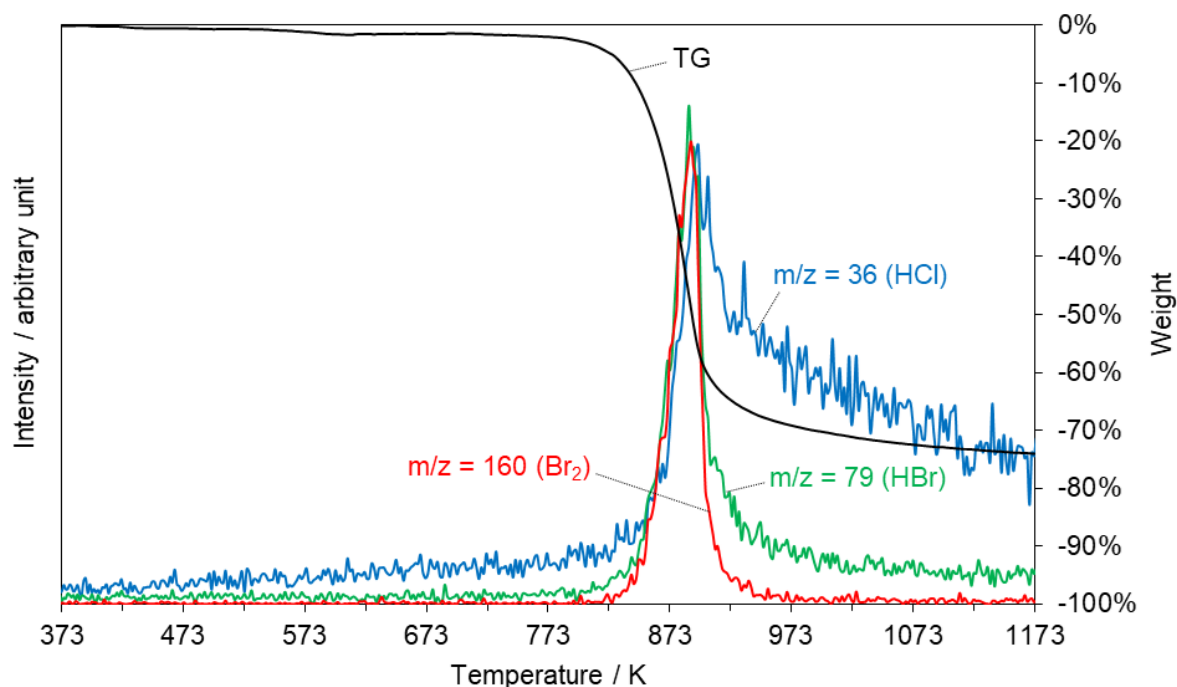

**Fig. S9** TG-DTA/EI-MS data of G58 monitored under He flow (heating rate:  $10 \text{ K min}^{-1}$ ). The profiles for the main halogen-containing components (HCl, HBr, and Br<sub>2</sub>) are presented.

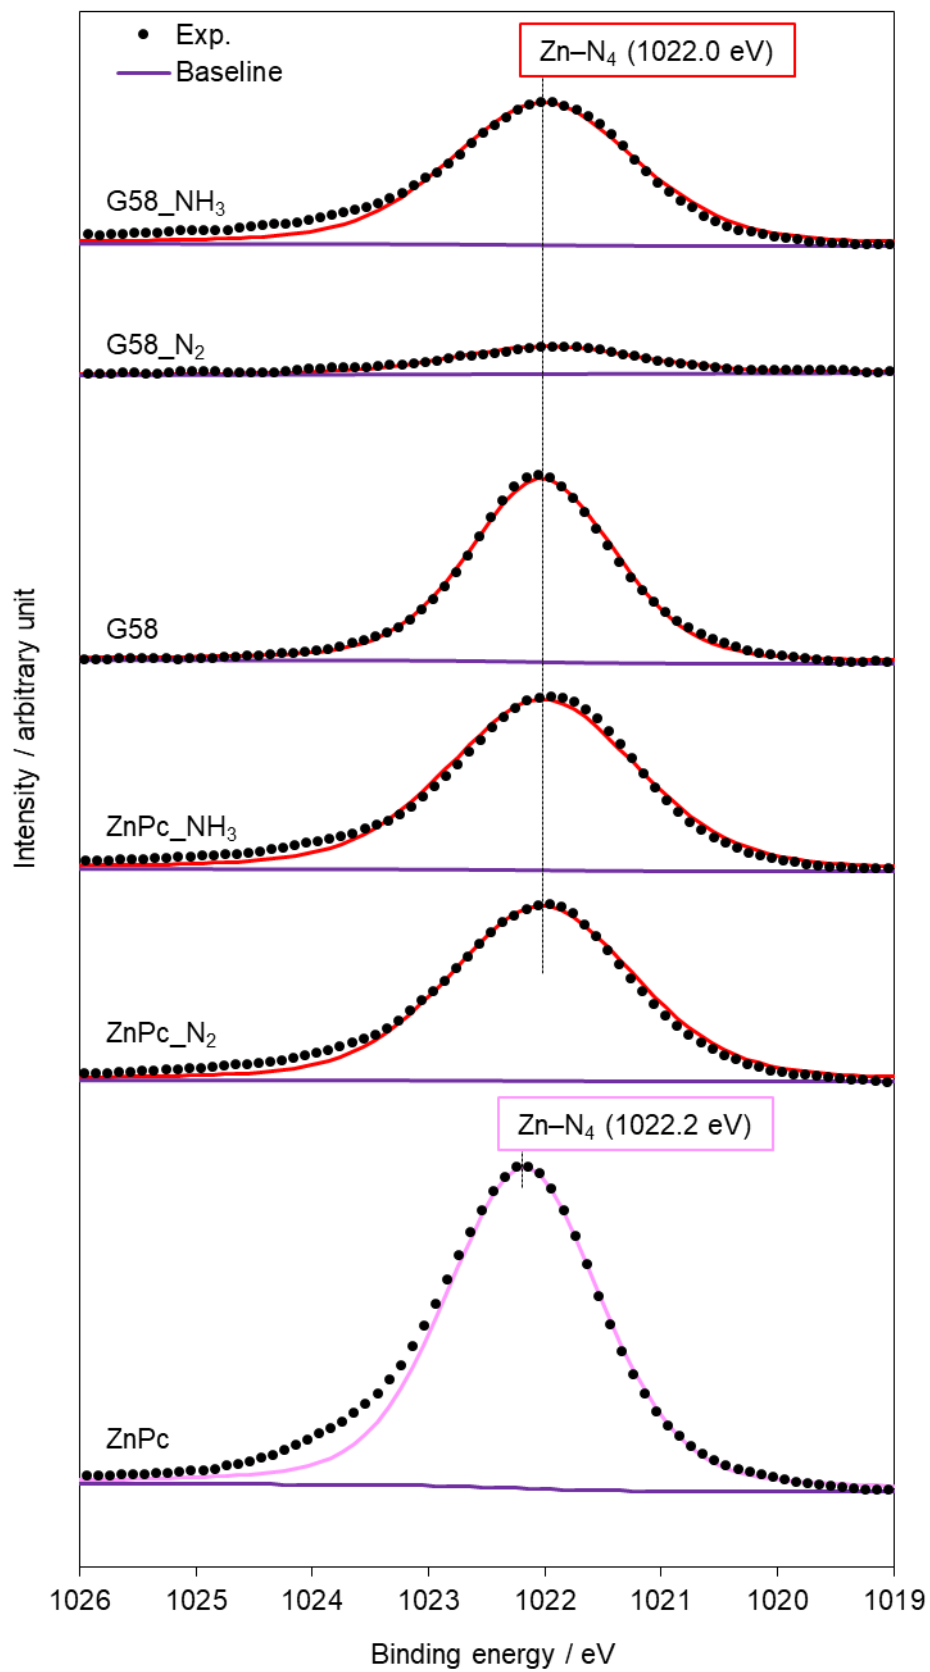

**Fig. S10** The Zn 2p<sub>3/2</sub> XPS spectra of ZnPc and G58 and their corresponding carbons.

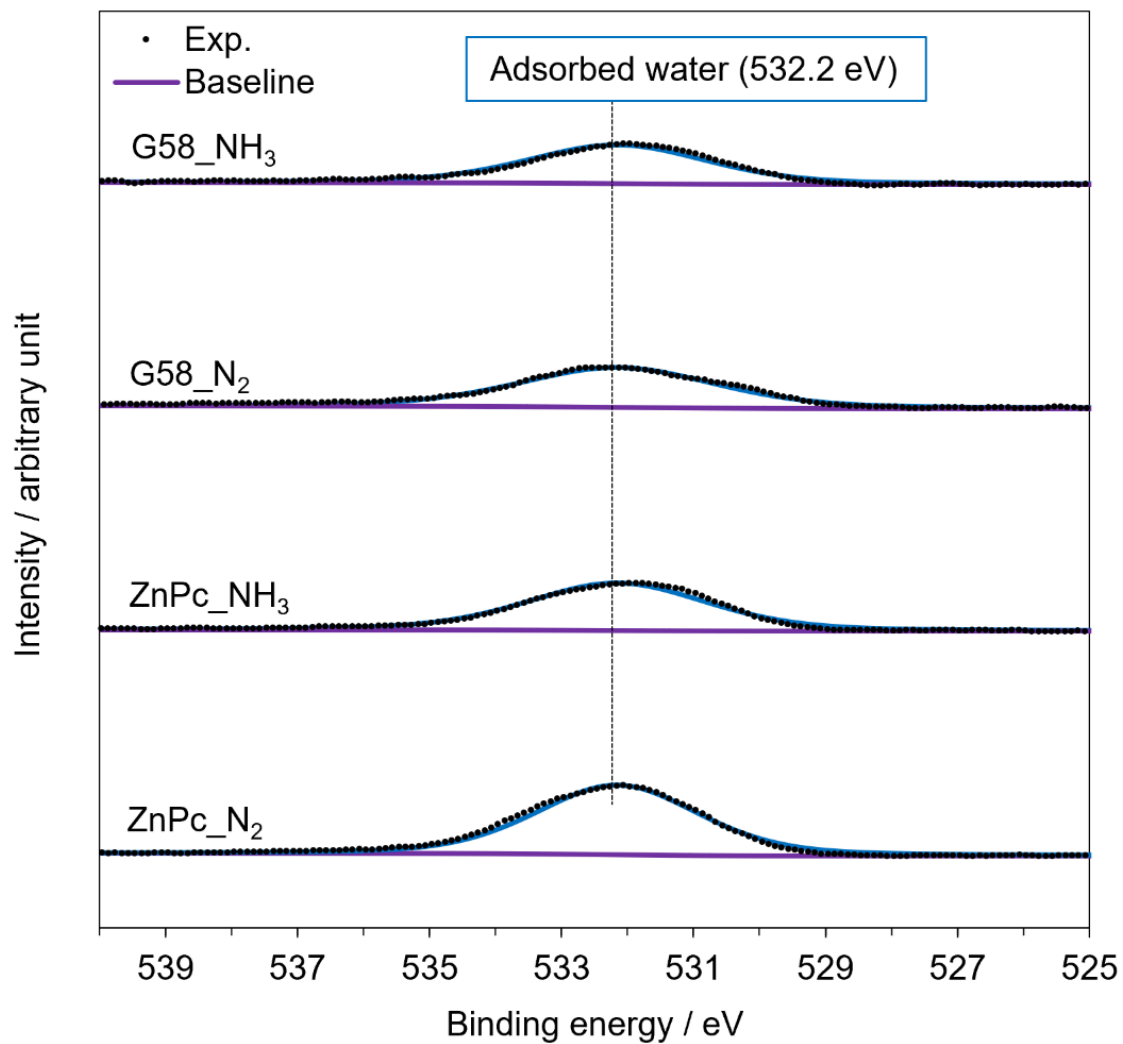

**Fig. S11** The O 1s XPS spectra of the carbons.

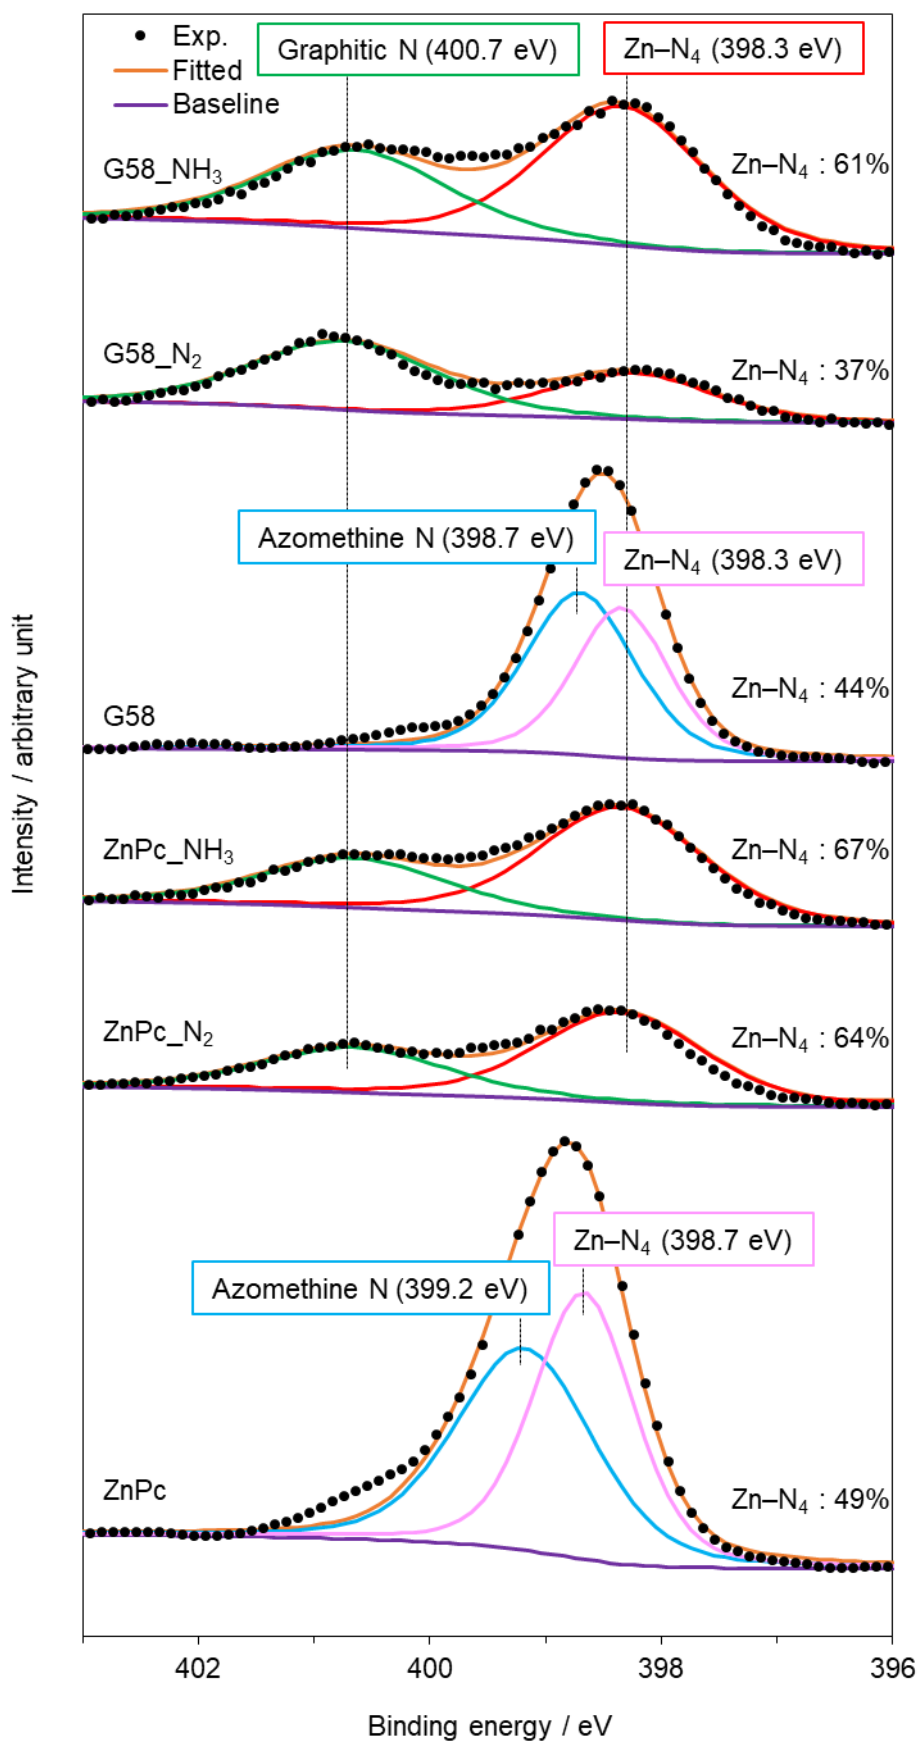

**Fig. S12** The N 1s XPS spectra of ZnPc and G58 and their corresponding carbons.

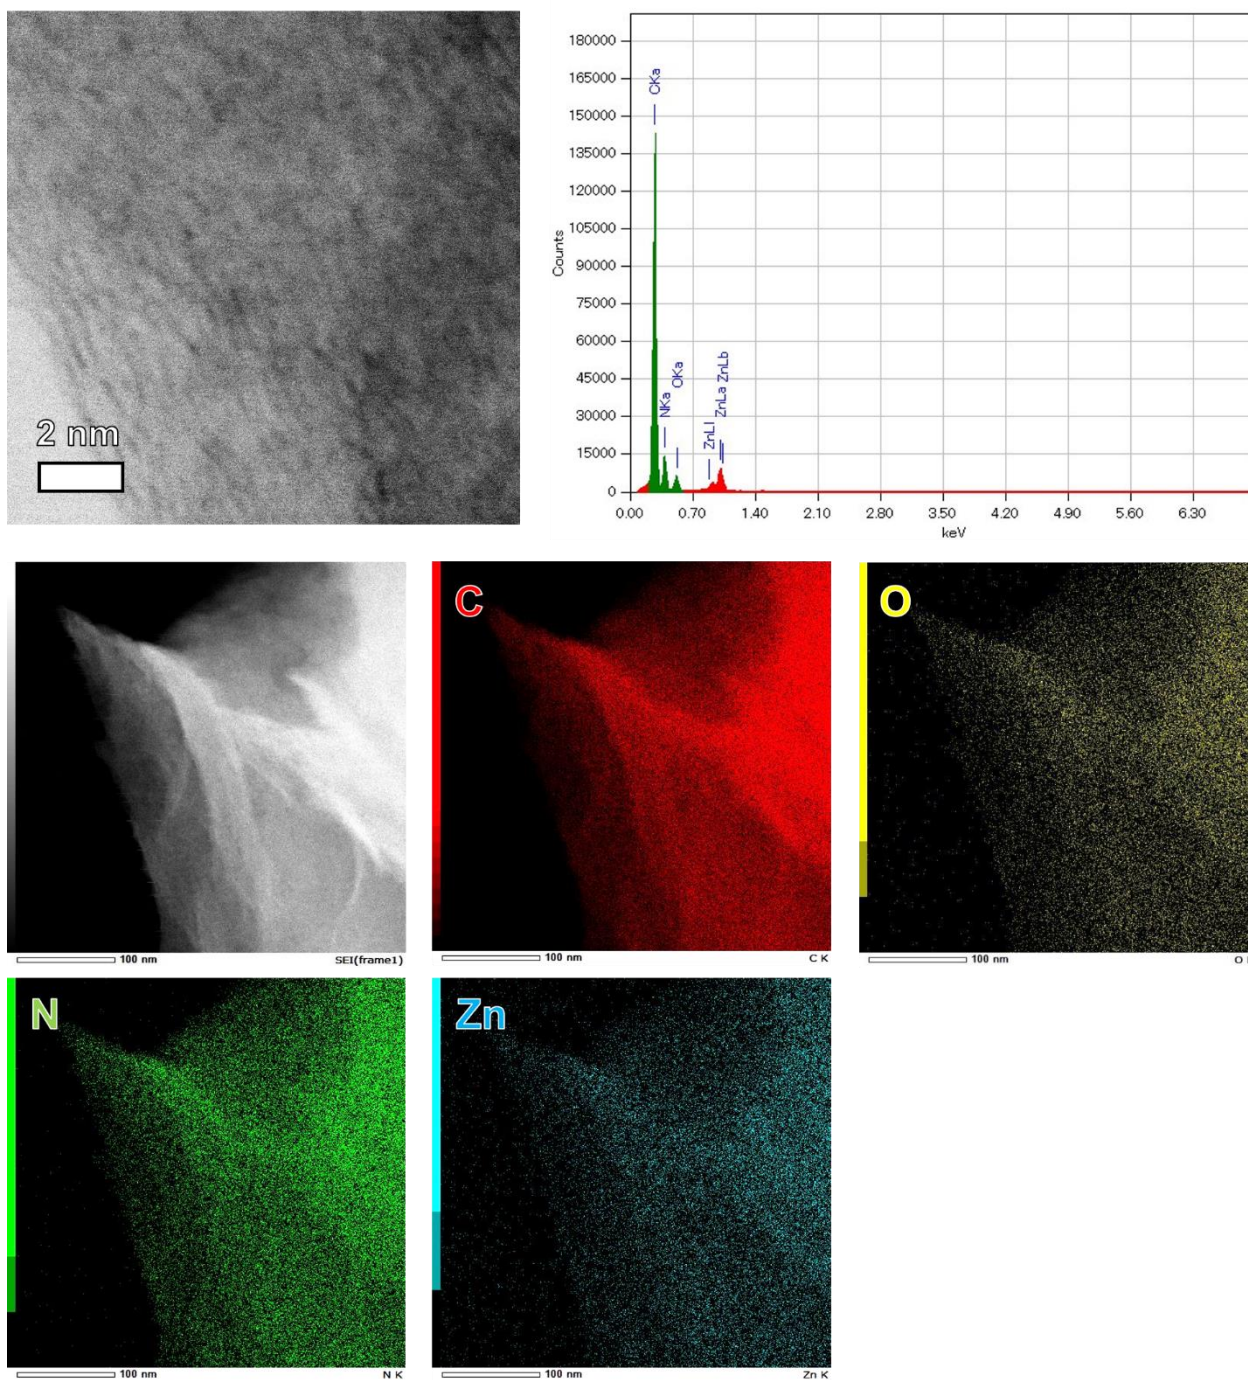

**Fig. S13** STEM image, EDS mapping results and EDS spectrum of ZnPc\_NH<sub>3</sub>.



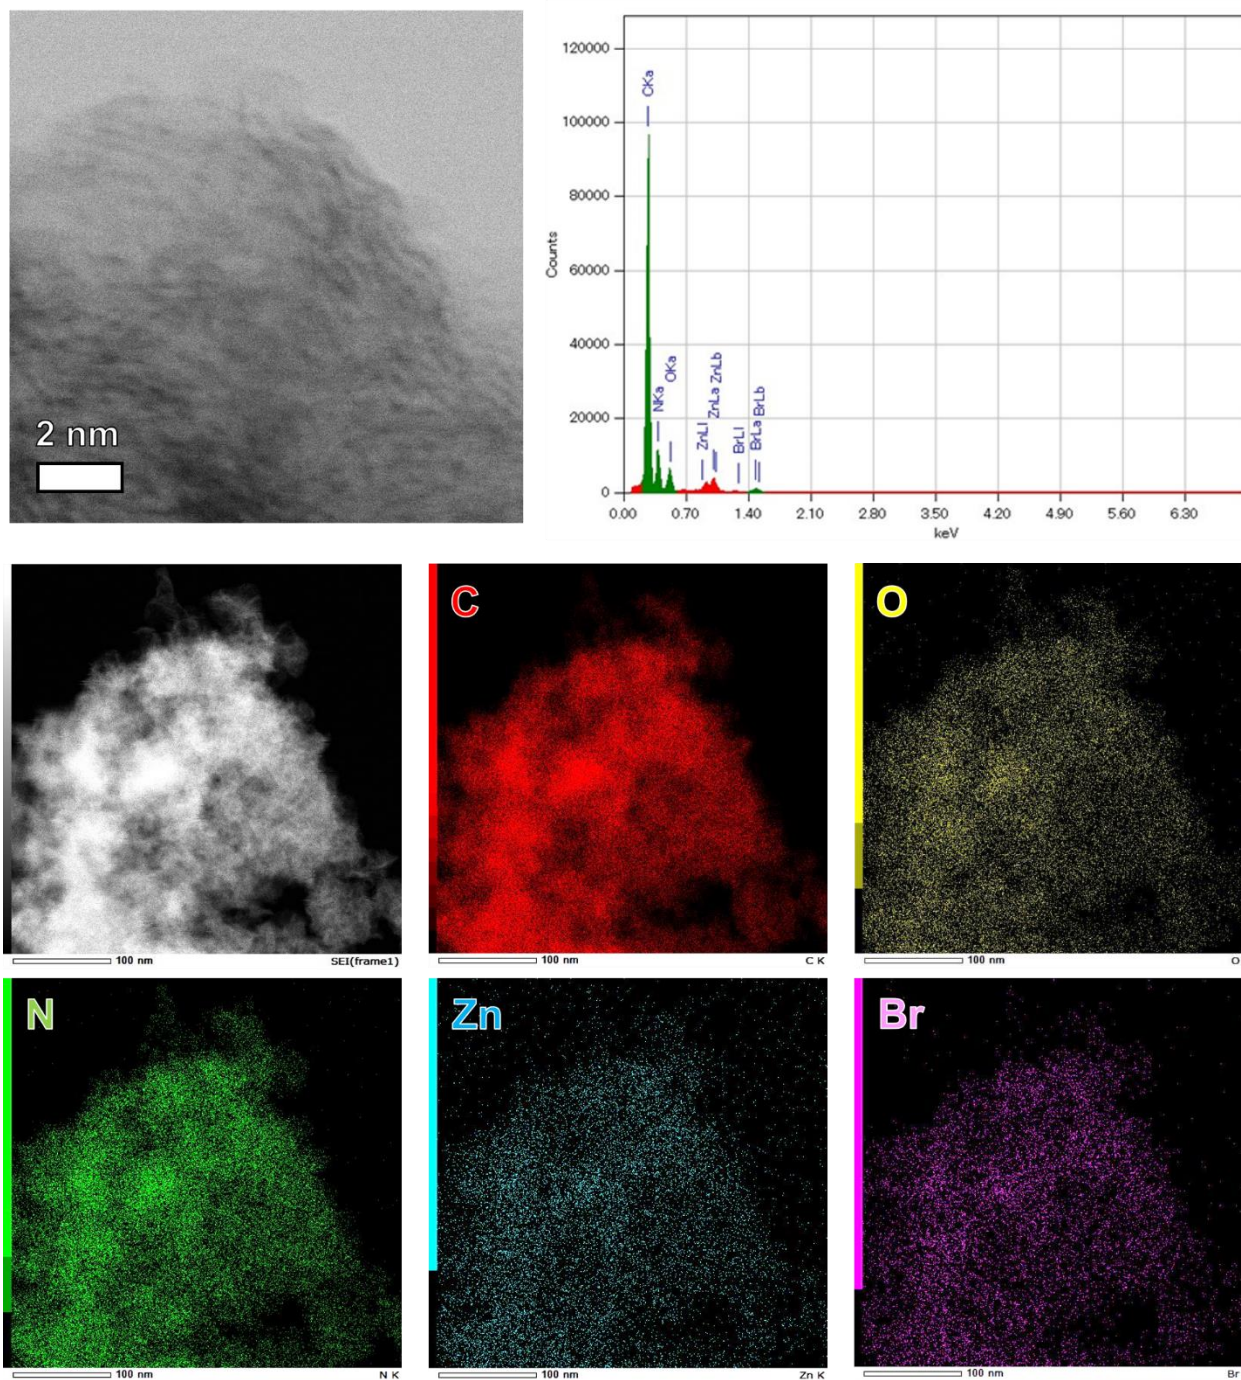

**Fig. S14** STEM image, EDS mapping results and EDS spectrum of G58\_NH<sub>3</sub>.

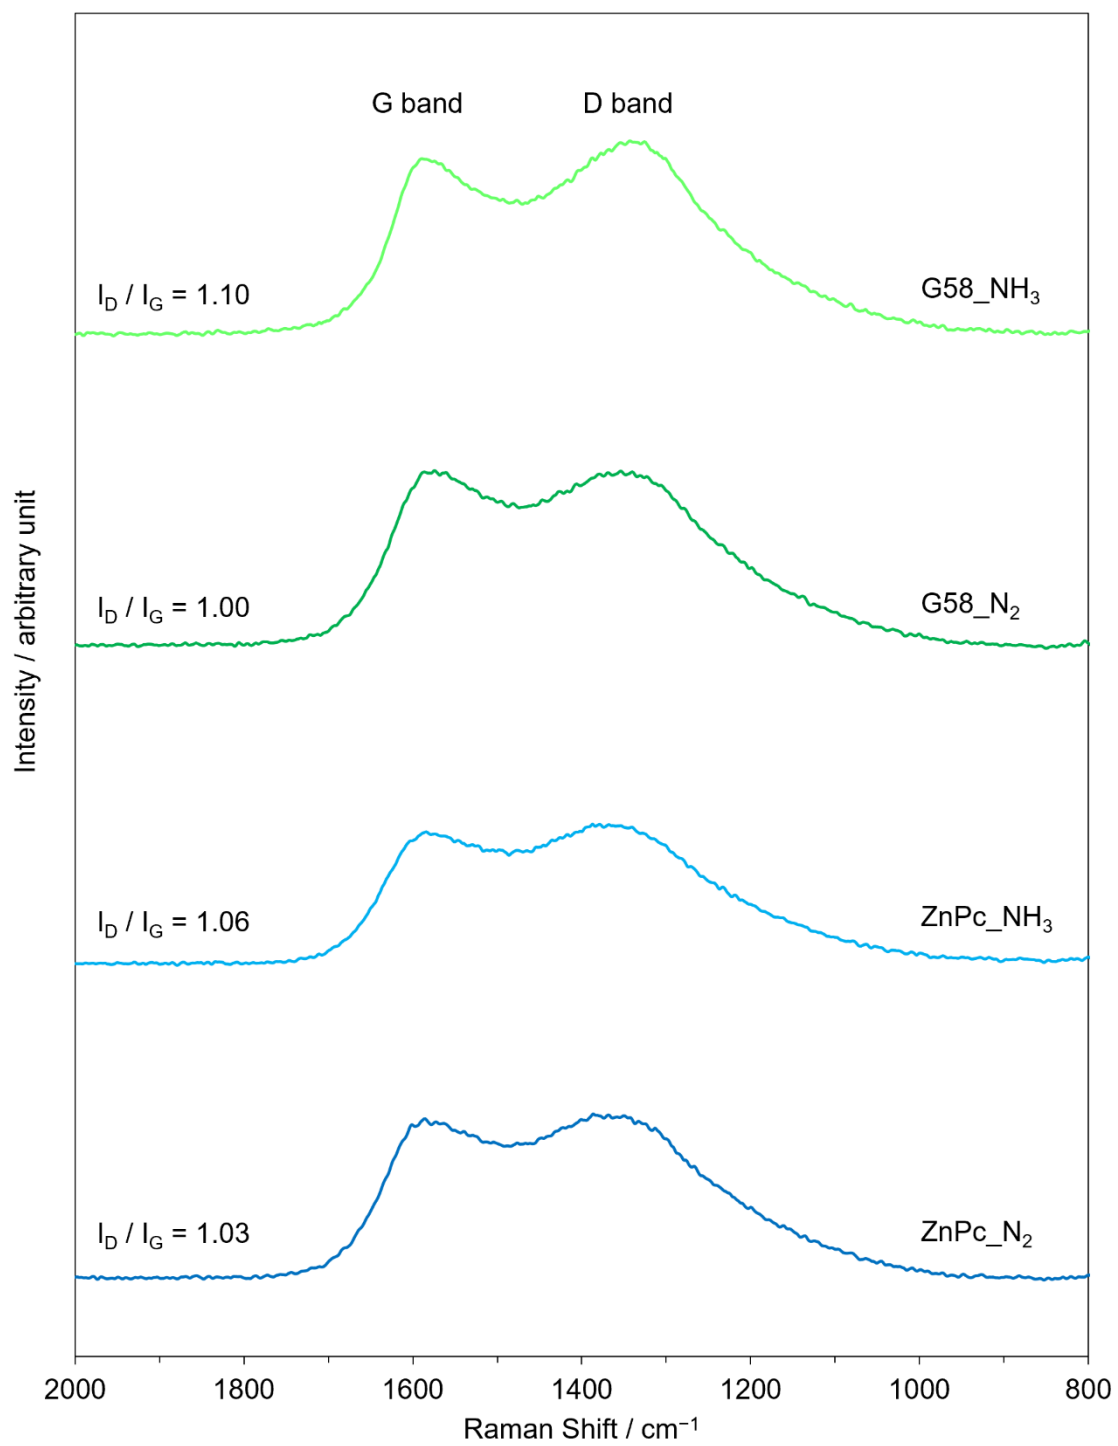

**Fig. S15** Raman spectra of the carbons.

## References

- [1] R. Jiang, X. Chen, W. Liu, T. Wang, D. Qi, Q. Zhi, W. Liu, W. Li, K. Wang and J. Jiang, *ACS Appl. Energy Mater.*, 2021, **4**, 2481–2488.
- [2] S. Yang, X. Xue, X. Liu, W. Liu, J. Bao, Y. Huang, H. Su, S. Yuan and H. Li, *ACS Appl. Mater. Interfaces*, 2019, **11**, 39263–39273.
- [3] Y. Shiraishi, K. Kinoshita, K. Sakamoto, K. Yoshida, W. Hiramatsu, S. Ichikawa, S. Tanaka and T. Hirai, *Chem. Commun.*, 2024, **60**, 10866–10869.
- [4] M. Muhyuddin, D. Testa, R. Lorenzi, G. Maria Vanacore, F. Poli, F. Soavi, S. Specchi, W. Giurlani, M. Innocenti, L. Rosi and C. Santoro, *Electrochim. Acta*, 2022, **433**, 141254.
- [5] J.-H. Bang, B.-H. Lee, Y.-C. Choi, H.-M. Lee and B.-J. Kim, *Int. J. Mol. Sci.*, 2022, **23**, 8537.
- [6] R. S. Mikhail, S. Brunauer and E. E. Bodor, *J. Colloid Interface Sci.*, 1968, **26**, 45–53.
- [7] L. Osmieri, A. H.A. Monteverde Videla, M. Armandi and S. Specchia, *Int. J. Hydrogen. Energy*, 2016, **41**, 22570–22588.
- [8] Q. Ma, G. Long, X. Tang, X. Li, X. Wang, C. You, W. Fan and Q. Wang, *Molecules*, 2023, **28**, 4257.
- [9] J. Luo, K. Wang, X. Hua, W. Wang, J. Li, S. Zhang and S. Chen, *Small*, 2019, **15**, 1805325.
- [10] J. Li, S. Chen, N. Yang, M. Deng, S. Ibraheem, J. Deng, J. Li, L. Li and Z. Wei, *Angew. Chem. Int. Ed.*, 2019, **58**, 7035–7039.
- [11] T. Butburee, J. Ponchai, P. Khemthong, P. Mano, P. Chakthranont, S. Youngjan, J. Phanthasri, S. Namuangruk, K. Faungnawakij, X. Wang, Y. Chen and L. Zhang, *ACS Appl. Mater. Interfaces.*, 2024, **16**, 10227–10237.
- [12] P. Song, M. Luo, X. Liu, W. Xing, W. Xu, Z. Jiang and L. Gu, *Adv. Funct. Mater.*, 2017, **27**, 1700802.
